# Supplementary material for: OH/Na co-functionalized carbon nitride: directional charge transfer and enhanced photocatalytic oxidation ability
Source: Royal Society of Chemistry journal article supplement (doi:10.1039/c9cy02048a), 2019-11-28
Supplement: c9cy02048a1.pdf [file c9cy02048a1.pdf]

## Electronic Supplementary Information for

### **OH/Na co-functionalized carbon nitride: directional charge transfer and enhanced photocatalytic oxidation ability**

Jiadong Wang,<sup>a,b</sup> Wen Cui,<sup>b,c</sup> Ruimin Chen,<sup>a</sup> Ye He,<sup>b</sup> Chaowei Yuan,<sup>a,b</sup> Jianping Sheng,<sup>b</sup> Jieyuan Li,<sup>b</sup> Yuxin Zhang,<sup>d</sup> Fan Dong,<sup>a,b</sup> and Yanjuan Sun<sup>\*a,b</sup>

a. Chongqing Key Laboratory of Catalysis and New Environmental Materials, College of Environment and Resources, Chongqing Technology and Business University, Chongqing 400067, China.

b. Research Center for Environmental Science & Technology, Institute of Fundamental and Frontier Sciences, University of Electronic Science and Technology of China, Chengdu 611731, China.

c. The Center of New Energy Materials and Technology, School of Materials Science and Engineering, Southwest Petroleum University, Chengdu 610500, China.

d. College of Materials Science and Engineering, Chongqing University, Chongqing 400044, China.

\* Corresponding author: Yanjuan Sun (syhsyj@163.com)

# CONTENTS

|                                                                                                                         |          |
|-------------------------------------------------------------------------------------------------------------------------|----------|
| <b>Characterization .....</b>                                                                                           | <b>3</b> |
| <b>Continuous reactor for photocatalytic NO removal .....</b>                                                           | <b>3</b> |
| <b>In situ DRIFTS study on photocatalytic NO oxidation process .....</b>                                                | <b>4</b> |
| <b>Figures .....</b>                                                                                                    | <b>5</b> |
| Scheme S1 Schematic diagram of continuous photocatalytic reactor and the picture                                        | 5        |
| Scheme S2 The designed reaction system for the <i>in situ</i> DRIFTS signal recording and the picture .....             | 5        |
| Fig. S1 N <sub>2</sub> adsorption-desorption isotherm.....                                                              | 6        |
| Fig. S2 Photoluminescence spectra of the as-obtained samples .....                                                      | 6        |
| Fig. S3 The 0.15-CN of density of states (total and each element ) .....                                                | 7        |
| Fig. S4 In the gas component of NO + O <sub>2</sub> , photocatalytic adsorption process for CN (a) and 0.15-CN (b)..... | 7        |
| <b>Table .....</b>                                                                                                      | <b>8</b> |
| Table S1 The BET surface area (S <sub>BET</sub> ).....                                                                  | 8        |
| Table S2 .....                                                                                                          | 8        |
| <b>References .....</b>                                                                                                 | <b>9</b> |

## Characterization

The crystal phases of the samples were analyzed by X-ray diffraction (XRD) with CuK $\alpha$  radiation (Model D/max RA, Rigaku Co., Japan). X-ray photoelectron spectroscopy (XPS) with AlK $\alpha$  X-ray radiation ( $h\nu = 1486.6$  eV) operated at 150 W (Thermo ESCALAB 250, USA) was used to investigate the surface properties. Scanning electron microscopy (SEM, Model JSM-6490, Japan) and transmission electron microscopy (TEM, JEM-2010, Japan) were used to characterize the morphology and structure. Nitrogen adsorption-desorption isotherms were obtained on a nitrogen adsorption apparatus (ASAP 2020, USA) with all samples degassed at 300 °C for 4 h before measurements. Electron spin resonance (ESR) of radicals spin-trapped by 5,5-dimethyl-1-pyrroline N-oxide (DMPO) was recorded on a JES FA200 spectrometer. Samples for ESR measurement were prepared by mixing the samples in 50 mm DMPO solution tanks (aqueous dispersion for DMPO- $\bullet$ OH and methanol dispersion for DMPO- $\bullet$ O $_2^-$ ) and irradiated with visible light. Electron paramagnetic resonance (EPR) measurements were carried out on a Bruker ESP 500 spectrometer. Photoluminescence (PL) studies (F-7000, HITACHI, Japan) and UV-vis diffuse reflectance spectra (UV-vis DRS) were obtained for the dry-pressed disk samples using a scanning UV-vis spectrophotometer (UV-vis DRS, UV-2450, Shimadzu, Japan) equipped with an integrating sphere assembly to investigate the optical properties of the samples.

## Continuous reactor for photocatalytic NO removal

The photocatalytic NO purification ratio was investigated by the continuous-flow reactor at ppb level (500 ppb) (Scheme 1). A commercial tungsten halogen lamp (150 W, 0.16 W/cm $^2$ ) was placed vertically outside and above the reactor (rectangular reactor, 30  $\times$  15  $\times$  10 cm). A UV cutoff filter (420 nm) was adopted to remove UV light during the photocatalytic testing process. Preparation 0.2 g samples was evenly coated onto two glass plates with 10 mL distilled water and dried in an oven at 60 °C.

Then the dry glass plates were put into the reactor. The lamp was turned on when the adsorption–desorption equilibrium was reached. A NO<sub>x</sub> analyzer (Thermo Scientific, 42i-TL, USA) was applied to monitor the concentration of NO, NO<sub>2</sub> and NO<sub>x</sub> (NO + NO<sub>2</sub>) every minute. The purification ratio ( $\eta$ ) of NO was calculated using  $\eta = (1 - C/C_0) \times 100\%$ , where C and C<sub>0</sub> respectively represent the concentration of NO before and after turning on the lamp.

### **In situ DRIFTS study on photocatalytic NO oxidation process**

Photocatalysts were put into the reaction cell. First, the He gas (100 ml/min) was used to remove the residual hydrocarbons, H<sub>2</sub>O and CO<sub>2</sub> under 110 °C. The real-time FT-IR spectrum after ventilation was utilized as background. Then, the reaction mixtures (50 ml/min NO, 50 ml/min O<sub>2</sub>) were introduced into the cell. The NO adsorption on the catalysts was carried out for 20 min. Next, photocatalysts were illuminated by visible light source (MUA-210) for 1 h. The real-time FT-IR spectra were detected every eight minutes. Meanwhile the gas fluxes keep the same (50 ml/min NO, 50 mL/min O<sub>2</sub>). Finally, FT-IR spectra were recorded every two minutes with the same gas fluxes after turning off the light. The IR scanning range was 4000–600 cm<sup>-1</sup>. The intervals 2999-2400 cm<sup>-1</sup> and 2249-750 cm<sup>-1</sup> were analyzed to present the photocatalytic oxidation process on the catalysts.

## Figures

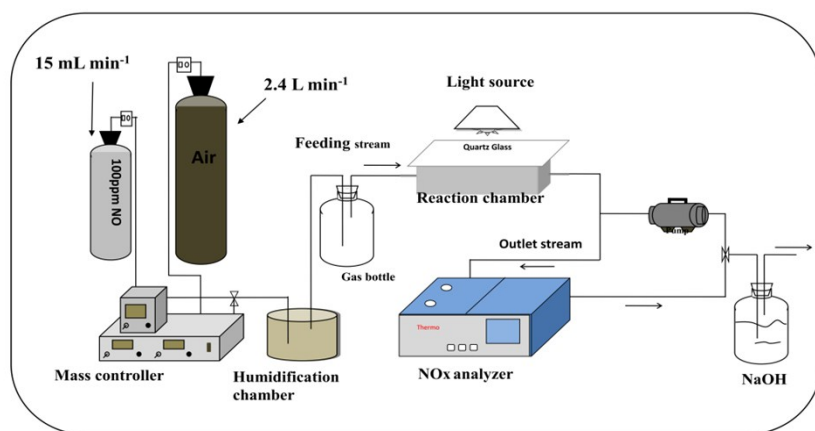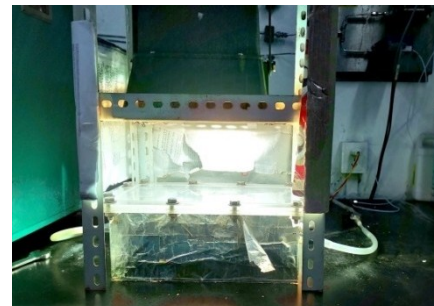

**Scheme S1** Schematic diagram of continuous photocatalytic reactor and the photo of the system

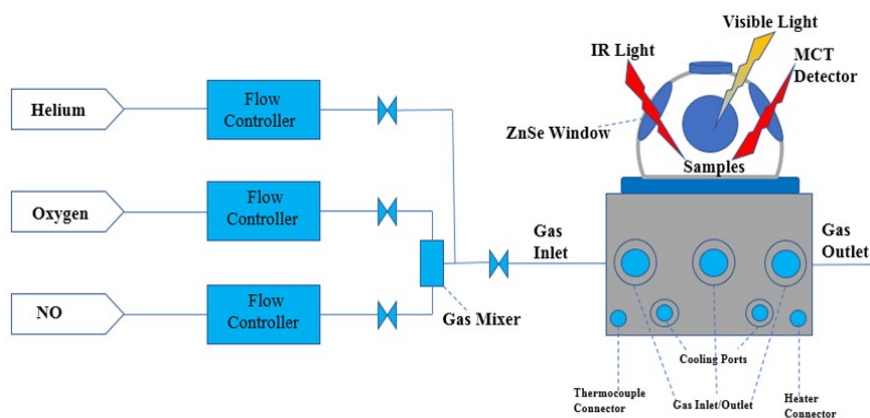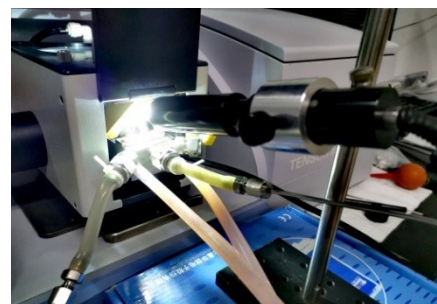

**Scheme S2** The designed reaction system for the *in situ* DRIFTS signal recording and the picture

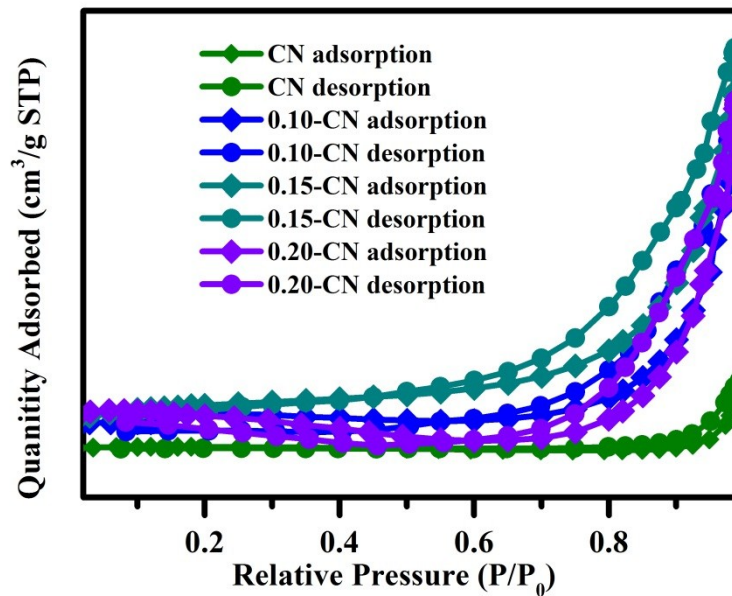

Fig. S1  $N_2$  adsorption-desorption isotherm

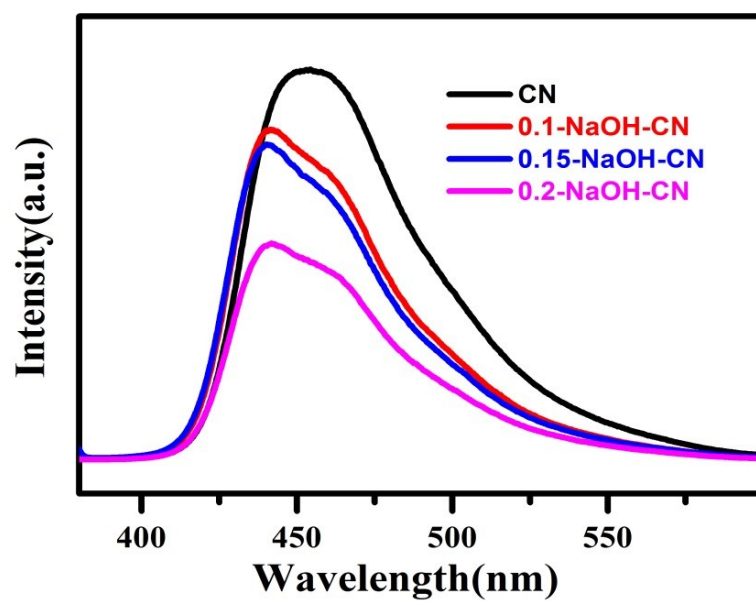

Fig. S2 Photoluminescence spectra of the as-obtained samples

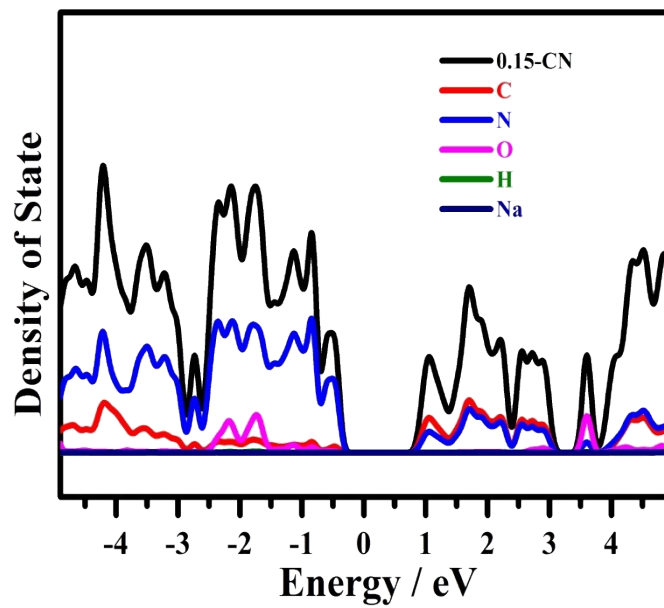

Fig. S3 The 0.15-CN of density of states (total and each element)

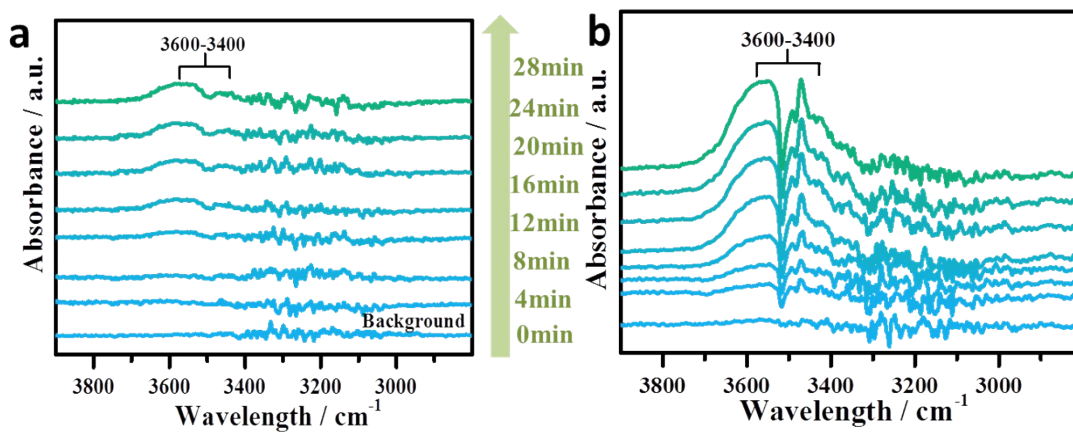

Fig. S4 In the gas component of  $\text{NO}+\text{O}_2$ , photocatalytic adsorption process for CN (a) and 0.15-CN (b)

## Table

**Table S1** The BET surface area ( $S_{\text{BET}}$ )

| Sample                               | CN     | 0.10-CN | 0.15-CN | 0.20-CN |
|--------------------------------------|--------|---------|---------|---------|
| $S_{\text{BET}}$ , m <sup>2</sup> /g | 4.8774 | 65.0354 | 39.5300 | 51.1141 |

**Table S2** Assignments of the IR bands observed during NO adsorption over CN

| Wavenumbers<br>(cm <sup>-1</sup> ) | Assignment                    | References |
|------------------------------------|-------------------------------|------------|
| 801                                | NO <sub>2</sub> <sup>-</sup>  | 1          |
| 859/883                            | chelated nitrites             | 1,2,3      |
| 915                                | N <sub>2</sub> O <sub>4</sub> | 4          |
| 1044/1049/1100                     | NOH/NO <sup>-</sup>           | 5,6,7      |
| 1363                               | monodentate nitrates          | 8          |
| 1463                               | bidentate nitrates            | 9          |
| 1600-1700                          | NO and free nitrate           | 7          |
| 2188                               | NO <sup>+</sup>               | 10,11      |
| 2772/2882                          | bridged nitrates              | 12         |
| 3400-3600                          | O-H                           | 5,12       |



## References

- 1 Y. Zhou, Z. Zhao, F. Wang, K. Cao, D. E. Doronkin, F. Dong and J. D. J. J. o. H. M. Grunwaldt, *J. Hazard. Mater*, 2016, 307, 163-172.
- 2 K. Hadjiivanov, V. Avreyska, A. Dimitar Klissurski and T. Marinova, *Langmuir*, 2012, 18, 1619-1625.
- 3 S. J. Huang, A. B. Walters and M. A. Vannice, *J. Catal*, 2000, 192, 29-47.
- 4 W. Cui, J. Li, W. Cen, Y. Sun, S. C. Lee and F. Dong, *J. Catal*, 2017, 352, 351-360.
- 5 M. Kantcheva and A. S. Vakkasoglu, *Journal of Catalysis*, 2004, 223, 352-363.
- 6 P. Chen, H. Wang, H. Liu, Z. Ni, J. Li, Y. Zhou and F. Dong, *Appl. Catal. B Environ*, 2019, 242, 19-30.
- 7 H. Li, H. Shang, X. Cao, Z. Yang, Z. Ai and L. Zhang, *Environ. Sci. Technol.*, 2018, 52, 8659-8665.
- 8 M. Kantcheva and A. S. Vakkasoglu, *J. Catal*, 2004, 223, 364-371.
- 9 K. Hadjiivanov, V. Bushev, M. Kantcheva and D. Klissurski, *Langmuir*, 1994, 10, 464-471.
- 10 B. Azambre, L. Zenboury, A. Koch and J. V. Weber, *J PHYS CHEM C*, 2009, 113, 13287-13299.
- 11 M. Kantcheva, *J. Catal*, 2001, 204, 479-494.
- 12 X. Li, W. Zhang, C. Wen, Y. Sun, G. Jiang, Y. Zhang, H. Huang and D. Fan, *Appl. Catal. B Environ*, 2017, 221, 482-489.
